# Supplementary material for: An Open-Hardware Insemination Device for Small-Bodied Live-Bearing Fishes to Support Development and Use of Germplasm Repositories
Source: MDPI journal article supplement (doi:10.3390/ani12080961), 2022-04-08
Supplement: s1 [file s1]

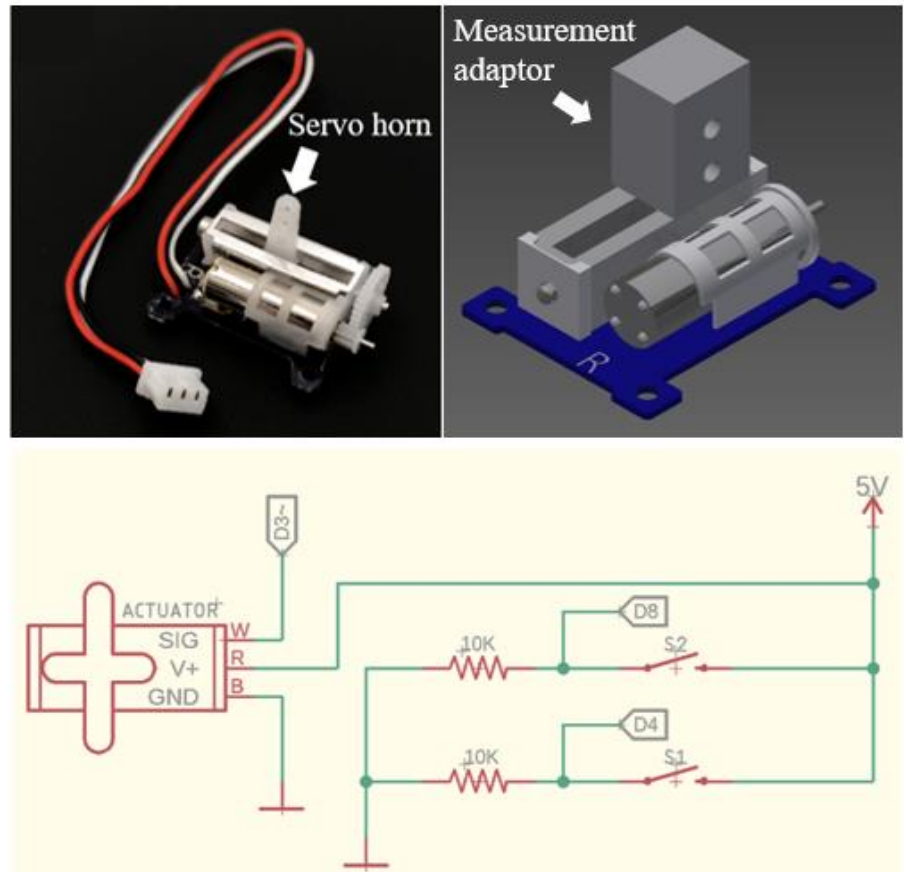

Supplemental Figure S1. The linear actuator (upper left) used in prototypes of the standardized artificial insemination device (SAID) and a 3-D rendering of an adaptor (upper right) to assist measurement of the position the servo horn. A circuit (bottom) was used to control the linear actuator with rotary buttons.

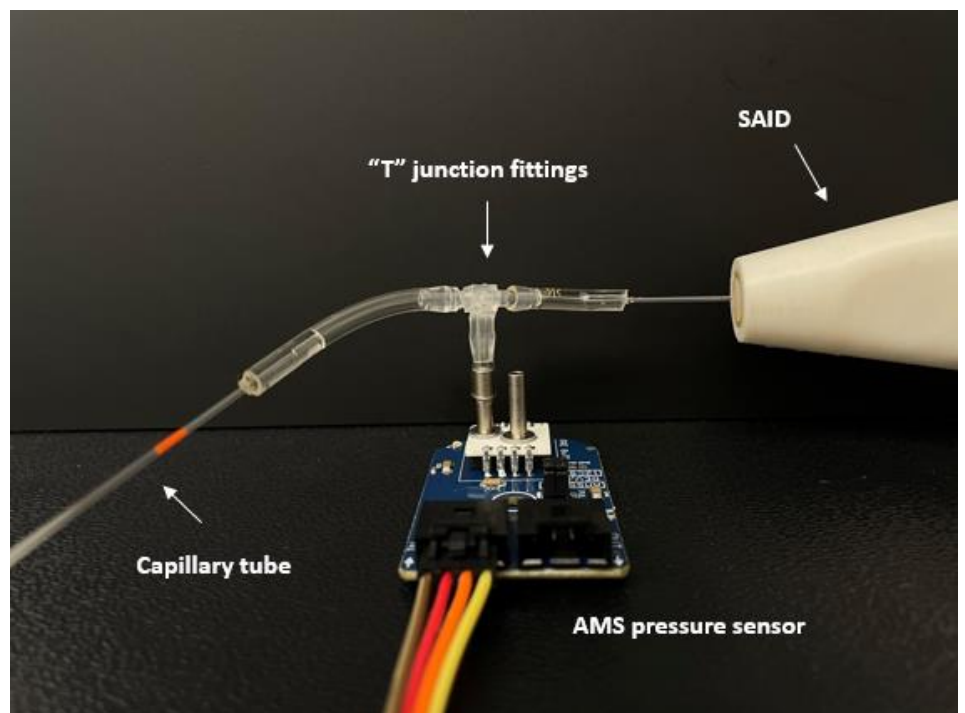

Supplemental Figure S2. Configuration of pressure measurement of a prototype standardized artificial insemination device (SAID).

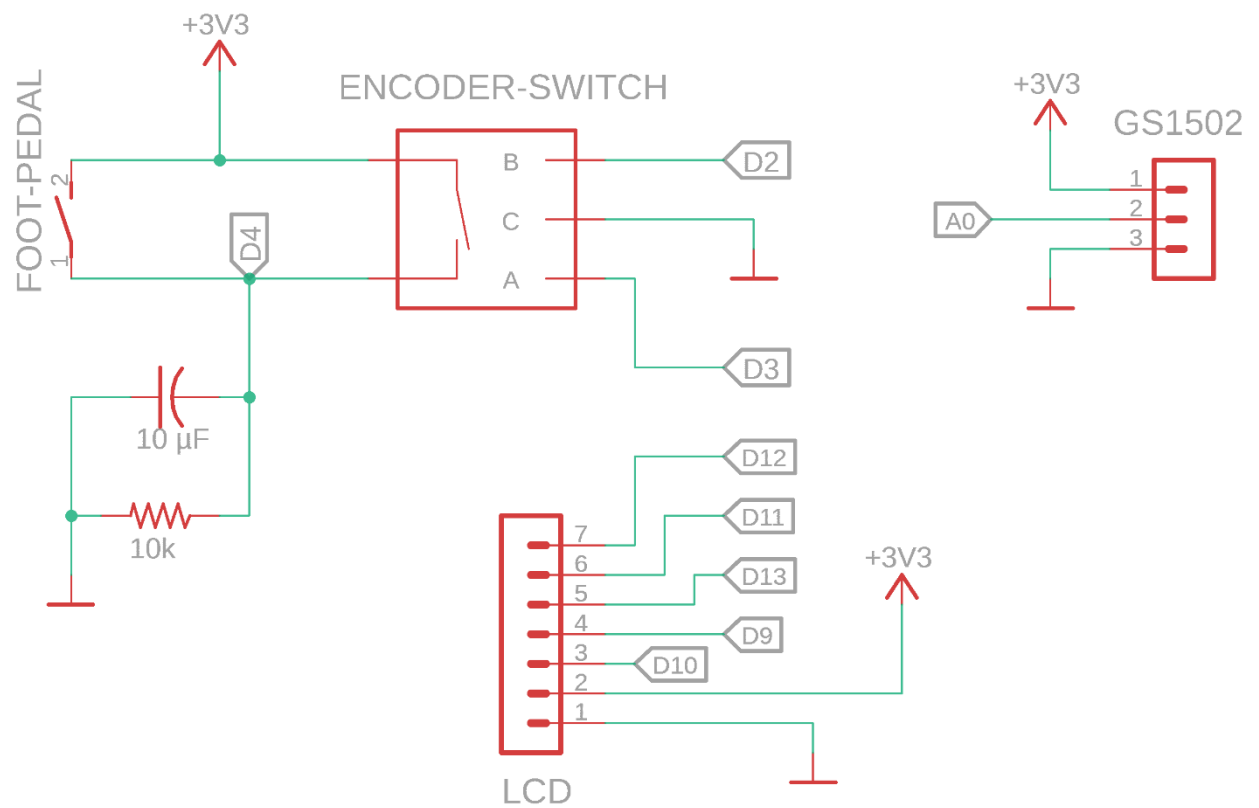

Supplemental Figure S3. Circuits for control and user interface of a prototype standardized artificial insemination device (SAID) based on use of the Arduino Nano microcontroller.

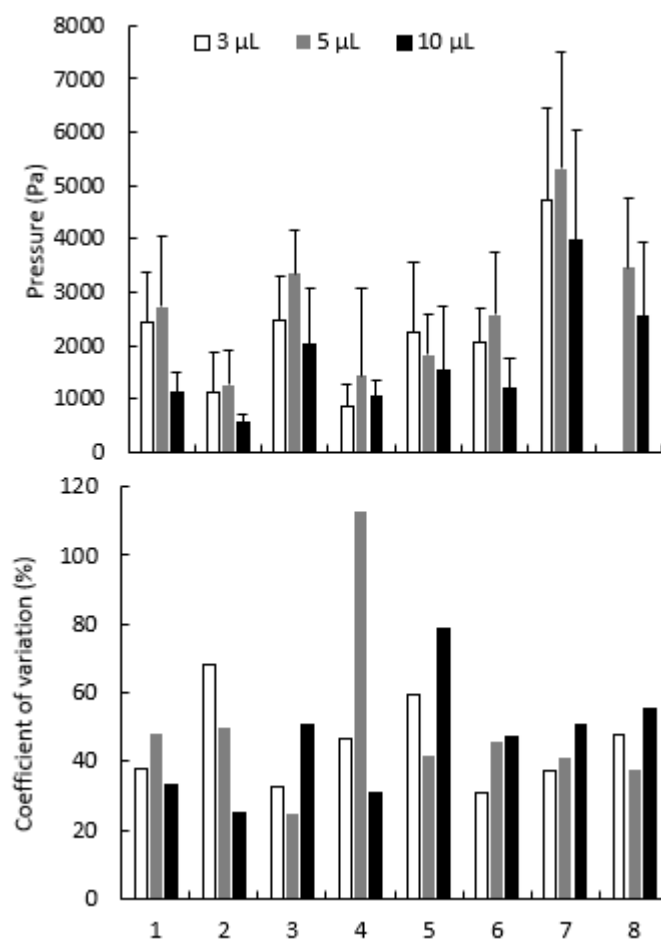

Supplemental Figure S4. Peak pressure (upper panel) variability (lower panel) generated during mouth-pipetting among eight operators when asked to inject samples as quickly as possible. Bars represent standard deviation.

Supplemental Table S1. Specifications for FDM printing of the handling case, interlocking clip, servo case, and user interface case.

| Parameters              | Specifications |
|-------------------------|----------------|
| General settings:       |                |
| Hotend temperature      | 200°C          |
| Print speed             | 50 mm/s        |
| Nozzle type             | Copper         |
| Nozzle diameter         | 0.4 mm         |
| Line width              | 0.4 mm         |
| Nominal layer height    | 0.12 mm        |
| Retraction distance     | 5 mm           |
| Retraction speed        | 45 mm/s        |
| Build plate temperature | 50 °C          |
| Fan speed               | 100%           |
| Perimeter layer number  | 2              |
| Top layer number        | 2              |
| Bottom layer number     | 2              |
| First layer settings:   |                |
| Build plate adhesion    | Raft           |
| Raft air gap            | 0.2 mm         |
| Raft top layers         | 3              |
| Raft print speed        | 25 mm/s        |
| Raft fan speed          | 0%             |
| Initial layer speed     | 20 mm/s        |
| Initial layer height    | 0.12 mm        |
| Initial line width      | 0.45 mm        |

Supplemental Table S2. Specifications for resin printing of the cylindrical chamber, piston adaptor, and linear actuator base.

| Parameter                   | Specifications          |
|-----------------------------|-------------------------|
| Print settings:             |                         |
| Layer height                | 0.05 mm                 |
| Normal exposure time        | 15 s                    |
| Off time                    | 6 s                     |
| Bottom layers               | 8                       |
| Bottom exposure time        | 40 s                    |
| Post-processing steps:      |                         |
| Ultrasonic bath             | 2 min                   |
| Solvent                     | 99.5% Isopropyl alcohol |
| UV curing time <sup>a</sup> | 5 minutes               |
